# Supplementary material
Source: publisher site journal article supplement (https://www.spandidos-publications.com/7877/downloadSupplementary)
Supplement: Supplementary file 1 [file downloadSupplementary]

## Sheet: Supplementary Table 1
Table SI. KEGG pathway enrichment analysis of GMI-regulated differentially expressed proteins.
Fold Enrichment	Enrichment FDR	nGenes	Pathway Genes	Pathway	URL	Genes
9.96993	6.86955e-07	12	85	Path:hsa04610 Complement and coagulation cascades	http://www.genome.jp/kegg-bin/show_pathway?hsa04610	CD55 F2 F5 ITGB2 SERPINC1 C5 C6 C7 C8G C9 VTN VWF
8.82755	3.88607e-06	11	88	Path:hsa04512 ECM-receptor interaction	http://www.genome.jp/kegg-bin/show_pathway?hsa04512	COL1A1 HSPG2 ITGA6 ITGA1 ITGA3 ITGA5 ITGAV ITGB1 SDC4 VTN VWF
7.49004	7.44896e-07	14	132	Path:hsa04142 Lysosome	http://www.genome.jp/kegg-bin/show_pathway?hsa04142	NPC2 AP4S1 CTSS CTSZ AGA GALNS GLA HEXA HEXB IGF2R M6PR ARSA CTSA HYAL2
6.42003	0.00248277	7	77	Path:hsa05412 Arrhythmogenic right ventricular cardiomyopathy	http://www.genome.jp/kegg-bin/show_pathway?hsa05412	ITGA6 ITGA1 ITGA3 ITGA5 ITGAV ITGB1 PKP2
6.19477	0.0120675	5	57	Path:hsa05134 Legionellosis	http://www.genome.jp/kegg-bin/show_pathway?hsa05134	ITGB2 MYD88 NFKB2 SAR1B CASP8
5.88503	0.00704424	6	72	Path:hsa04137 Mitophagy-animal	http://www.genome.jp/kegg-bin/show_pathway?hsa04137	CALCOCO2 GABARAPL2 TBK1 NBR1 MAP1LC3B2 TAX1BP1
5.57529	0.00823033	6	76	Path:hsa05140 Leishmaniasis	http://www.genome.jp/kegg-bin/show_pathway?hsa05140	IFNGR1 ITGB1 ITGB2 MYD88 PTGS2 STAT1
5.4927	0.00453486	7	90	Path:hsa05410 Hypertrophic cardiomyopathy	http://www.genome.jp/kegg-bin/show_pathway?hsa05410	ITGA6 ITGA1 ITGA3 ITGA5 ITGAV ITGB1 TPM2
5.37329	0.00488568	7	92	Path:hsa05222 Small cell lung cancer	http://www.genome.jp/kegg-bin/show_pathway?hsa05222	CDK4 AKT1 ITGA6 ITGA3 ITGAV ITGB1 PTGS2
5.1494	0.00598341	7	96	Path:hsa05414 Dilated cardiomyopathy	http://www.genome.jp/kegg-bin/show_pathway?hsa05414	ITGA6 ITGA1 ITGA3 ITGA5 ITGAV ITGB1 TPM2
4.94343	6.6108e-05	14	200	Path:hsa04510 Focal adhesion	http://www.genome.jp/kegg-bin/show_pathway?hsa04510	COL1A1 EGFR AKT1 PARVB ITGA6 ITGA1 ITGA3 ITGA5 ITGAV ITGB1 ROCK1 SHC1 VTN VWF
4.76092	0.0147924	6	89	Path:hsa05235 PD-L1 expression and PD-1 checkpoint pathway in cancer	http://www.genome.jp/kegg-bin/show_pathway?hsa05235	EGFR AKT1 CD274 (PD-L1) IFNGR1 MYD88 STAT1
4.57254	0.0030197	9	139	Path:hsa05162 Measles	http://www.genome.jp/kegg-bin/show_pathway?hsa05162	CDK4 AKT1 TBK1 MYD88 STAT1 TNFAIP3 CASP8 EIF3H TRADD
4.52695	0.00198024	10	156	Path:hsa04514 Cell adhesion molecules	http://www.genome.jp/kegg-bin/show_pathway?hsa04514	CADM1 CD274 ITGA6 ITGAV ITGB1 ITGB2 PTPRS PVR SDC4 CLDN10
4.50768	0.00308806	9	141	Path:hsa04140 Autophagy-animal	http://www.genome.jp/kegg-bin/show_pathway?hsa04140	GABARAPL2 DAPK1 AKT1 ATG4B TBK1 PRKCD RHEB MAP1LC3B2 MTMR14
4.41377	0.0108087	7	112	Path:hsa05145 Toxoplasmosis	http://www.genome.jp/kegg-bin/show_pathway?hsa05145	AKT1 IFNGR1 ITGA6 ITGB1 MYD88 STAT1 CASP8
4.12985	0.0030197	10	171	Path:hsa05164 Influenza A	http://www.genome.jp/kegg-bin/show_pathway?hsa05164	CDK4 CALCOCO2 AKT1 TBK1 IFNGR1 MYD88 PML STAT1 CASP8 TRADD
4.12382	0.00823033	8	137	Path:hsa05135 Yersinia infection	http://www.genome.jp/kegg-bin/show_pathway?hsa05135	ARPC1A AKT1 TBK1 ITGA5 ITGB1 MYD88 ROCK1 GIT2
3.95718	0.00120183	13	232	Path:hsa05171 Coronavirus disease-COVID-19	http://www.genome.jp/kegg-bin/show_pathway?hsa05171	EGFR F2 TBK1 MYD88 RPL38 RPS29 STAT1 C5 C6 C7 C8G C9 VWF
3.90527	0.00198024	12	217	Path:hsa04810 Regulation of actin cytoskeleton	http://www.genome.jp/kegg-bin/show_pathway?hsa04810	ARPC1A EGFR F2 FGFR4 ITGA6 ITGA1 ITGA3 ITGA5 ITGAV ITGB1 ITGB2 ROCK1
3.84566	0.0030197	11	202	Path:hsa05169 Epstein-Barr virus infection	http://www.genome.jp/kegg-bin/show_pathway?hsa05169	CDK4 AKT1 TBK1 MYD88 NFKB2 PSMC5 PSMC6 STAT1 TNFAIP3 CASP8 TRADD
3.84038	6.6108e-05	18	331	Path:hsa05165 Human papillomavirus infection	http://www.genome.jp/kegg-bin/show_pathway?hsa05165	CDK4 COL1A1 EGFR AKT1 TBK1 ITGA6 ITGA1 ITGA3 ITGA5 ITGAV ITGB1 PTGS2 RHEB STAT1 VTN VWF CASP8 TRADD
3.73197	0.00188685	13	246	Path:hsa05131 Shigellosis	http://www.genome.jp/kegg-bin/show_pathway?hsa05131	CALCOCO2 TNIP1 ARPC1A EGFR AKT1 TBK1 ITGA5 ITGB1 MYD88 PRKCD ROCK1 MAP1LC3B2 TRADD
3.59849	0.0153193	8	157	Path:hsa05160 Hepatitis C	http://www.genome.jp/kegg-bin/show_pathway?hsa05160	CDK4 EGFR AKT1 TBK1 STAT1 CASP8 TRADD CLDN10
3.55074	0.0108087	9	179	Path:hsa05152 Tuberculosis	http://www.genome.jp/kegg-bin/show_pathway?hsa05152	CTSS AKT1 IFNGR1 IRAK2 ITGB2 MYD88 STAT1 CASP8 TRADD
3.49606	0.0075695	10	202	Path:hsa05205 Proteoglycans in cancer	http://www.genome.jp/kegg-bin/show_pathway?hsa05205	COL1A1 EGFR AKT1 HSPG2 ITGA5 ITGAV ITGB1 ROCK1 SDC4 VTN
3.2762	0.0153193	9	194	Path:hsa05167 Kaposi sarcoma-associated herpesvirus infection	http://www.genome.jp/kegg-bin/show_pathway?hsa05167	CDK4 AKT1 TBK1 IFNGR1 PTGS2 MAP1LC3B2 STAT1 CASP8 TRADD
3.1527	0.0129083	10	224	Path:hsa05163 Human cytomegalovirus infection	http://www.genome.jp/kegg-bin/show_pathway?hsa05163	CDK4 EGFR AKT1 TBK1 ITGAV PTGS2 RHEB ROCK1 CASP8 TRADD
2.7929	0.00704424	14	354	Path:hsa04151 PI3K-Akt signaling pathway	http://www.genome.jp/kegg-bin/show_pathway?hsa04151	CDK4 COL1A1 EGFR AKT1 FGFR4 ITGA6 ITGA1 ITGA3 ITGA5 ITGAV ITGB1 RHEB VTN VWF
2.66492	0.00198024	20	530	Path:hsa05200 Pathways in cancer	http://www.genome.jp/kegg-bin/show_pathway?hsa05200	CDK4 TFG DAPK1 EGFR AKT1 F2 FGFR4 IFNGR1 ITGA6 ITGA3 ITGAV ITGB1 NFKB2 PML PTGS2 ROCK1 STAT1 CCDC6 NCOA4 CASP8
